# Supplementary material for: A Bayesian Approach for Forecasting the Probability of Large Earthquakes Using Thermal Anomalies from Satellite Observations
Source: MDPI journal article supplement (doi:10.3390/rs16091542), 2024-04-26
Supplement: s1 [file s1]

Supplementary Document for

**A Bayesian approach for Forecasting the Probability of Large Earthquakes  
using Thermal Anomalies from Satellite Observations**

Zhonghu Jiao<sup>1\*</sup>, Xinjian Shan<sup>1</sup>

<sup>1</sup> State Key Laboratory of Earthquake Dynamics, Institute of Geology, China Earthquake  
Administration, Beijing 100029, China; xjshan@ies.ac.cn

\*Correspondence: jzh@ies.ac.cn; Tel.: 0086-010-62009661

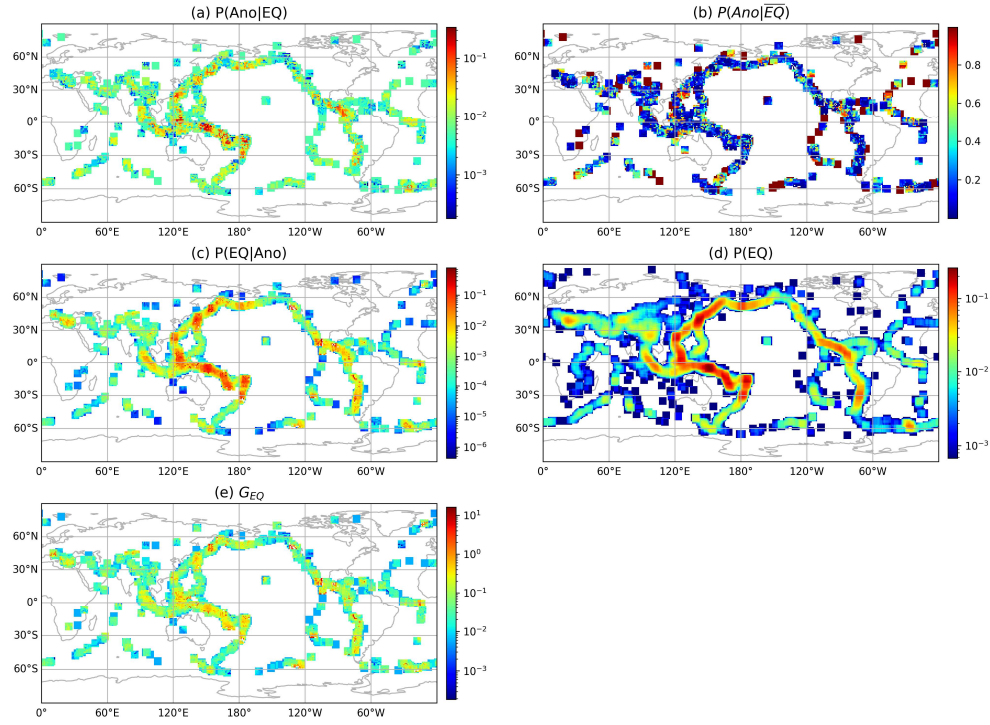

**Figure S1** Component analysis of earthquake forecast probability for the ST anomaly on December 31, 2020. (a) Probability of ST anomaly occurrence before earthquakes; (b) Probability of ST anomaly occurrence without earthquakes; (c) Posterior probability of earthquake occurrence given the ST anomaly; (d) Prior probability of earthquake occurrence; (e) Probability gain from the ST anomaly. Data were log10 transformed to emphasize very low values, except for panel (b).

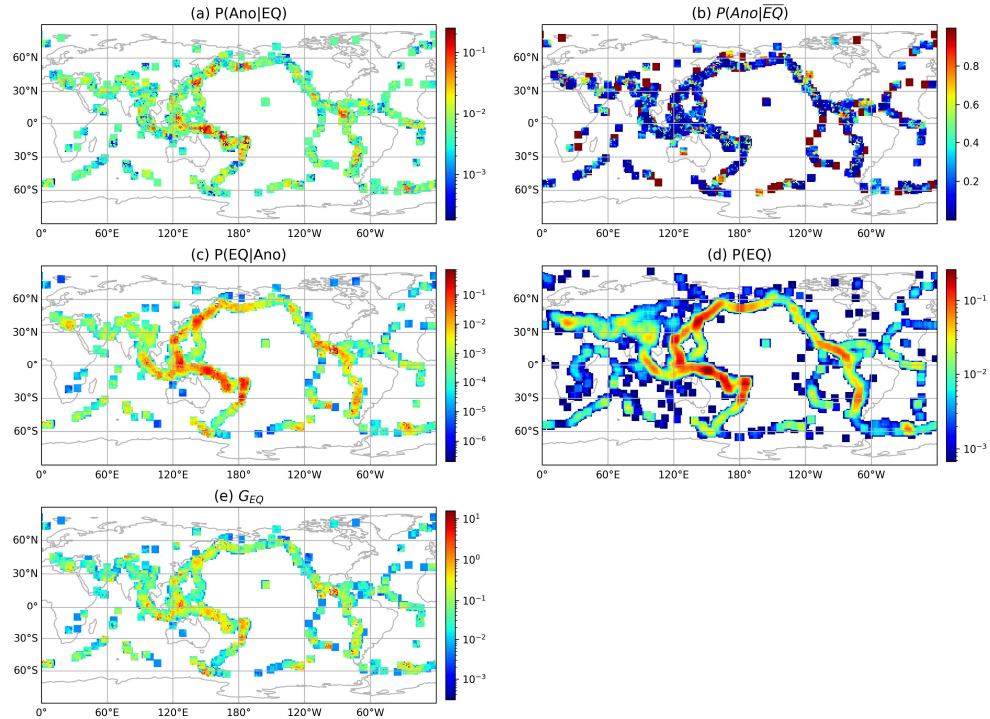

**Figure S2** Component analysis of earthquake forecast probability for the AT anomaly on December 31, 2020. (a) Probability of AT anomaly occurrence before earthquakes; (b) Probability of AT anomaly occurrence without earthquakes; (c) Posterior probability of earthquake occurrence given the AT anomaly; (d) Prior probability of earthquake occurrence; (e) Probability gain from the AT anomaly. Data were log10 transformed to emphasize very low values, except for panel (b).

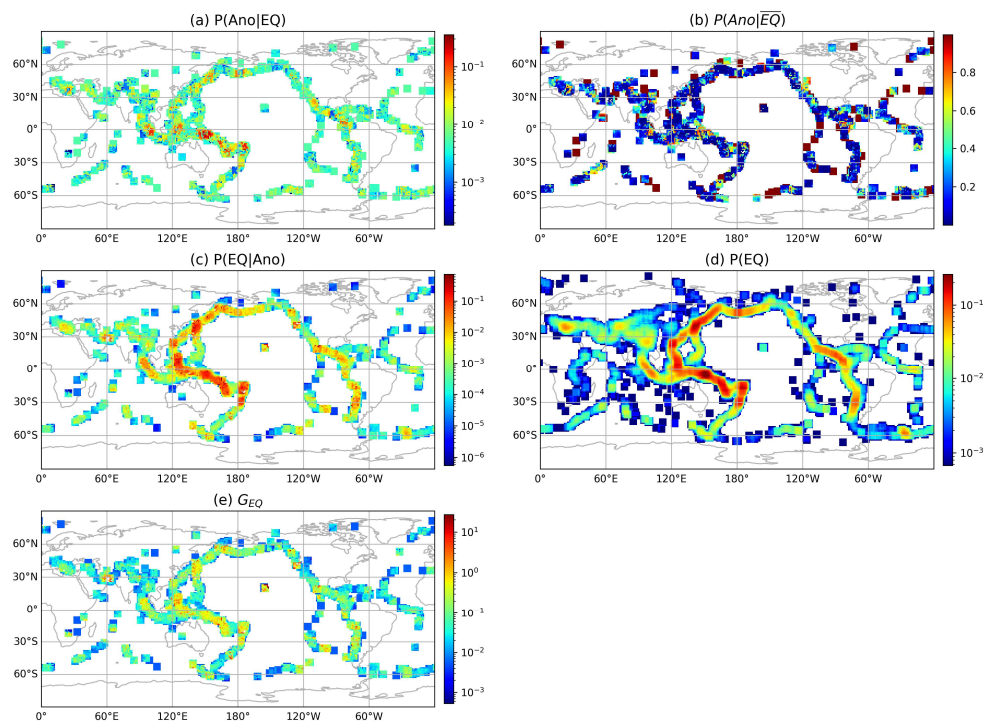

**Figure S3** Component analysis of earthquake forecast probability for the CWV anomaly on December 31, 2020. (a) Probability of CWV anomaly occurrence before earthquakes; (b) Probability of CWV anomaly occurrence without earthquakes; (c) Posterior probability of earthquake occurrence given the CWV anomaly; (d) Prior probability of earthquake occurrence; (e) Probability gain from the CWV anomaly. Data were log10 transformed to emphasize very low values, except for panel (b).

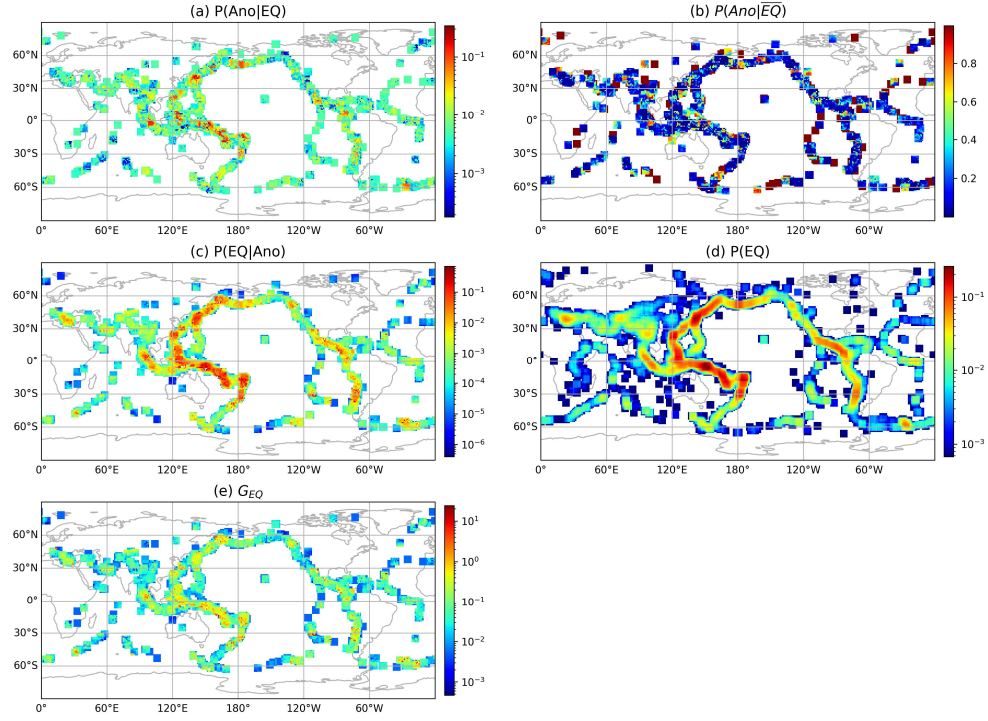

**Figure S4** Component analysis of earthquake forecast probability for the COLR anomaly on December 31, 2020. (a) Probability of COLR anomaly occurrence before earthquakes; (b) Probability of COLR anomaly occurrence without earthquakes; (c) Posterior probability of earthquake occurrence given the COLR anomaly; (d) Prior probability of earthquake occurrence; (e) Probability gain from the COLR anomaly. Data were log10 transformed to emphasize very low values, except for panel (b).



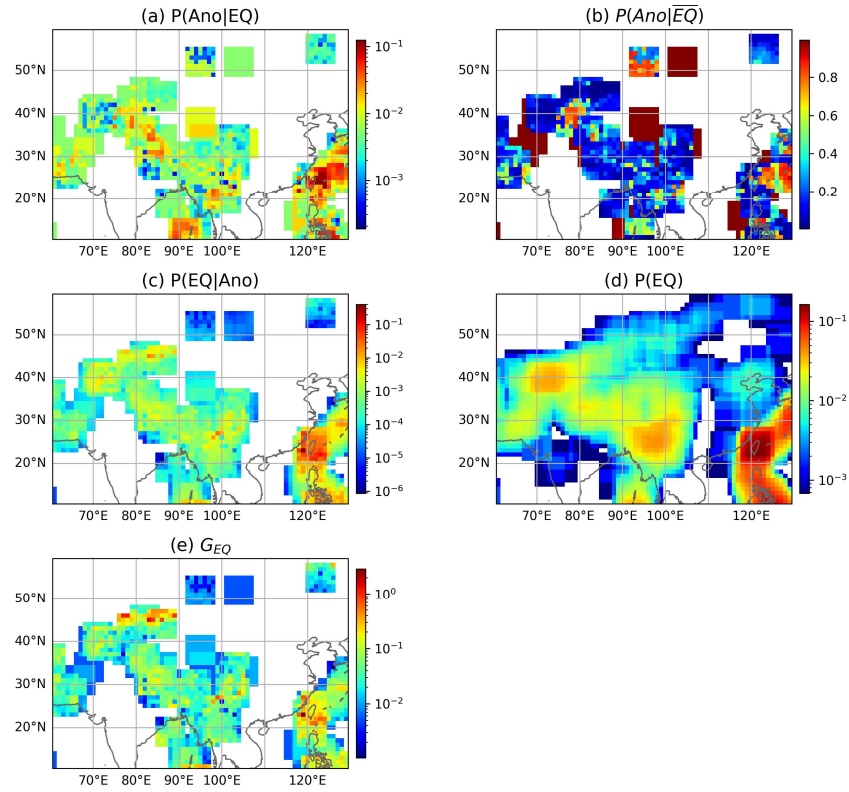

**Figure S5** Component analysis of earthquake forecast probability for the ST anomaly in Mainland China and adjacent regions on December 31, 2020. (a) Probability of ST anomaly occurrence before earthquakes; (b) Probability of ST anomaly occurrence without earthquakes; (c) Posterior probability of earthquake occurrence given the ST anomaly; (d) Prior probability of earthquake occurrence; (e) Probability gain from the ST anomaly. **Data were log10 transformed to emphasize very low values, except for panel (b).**

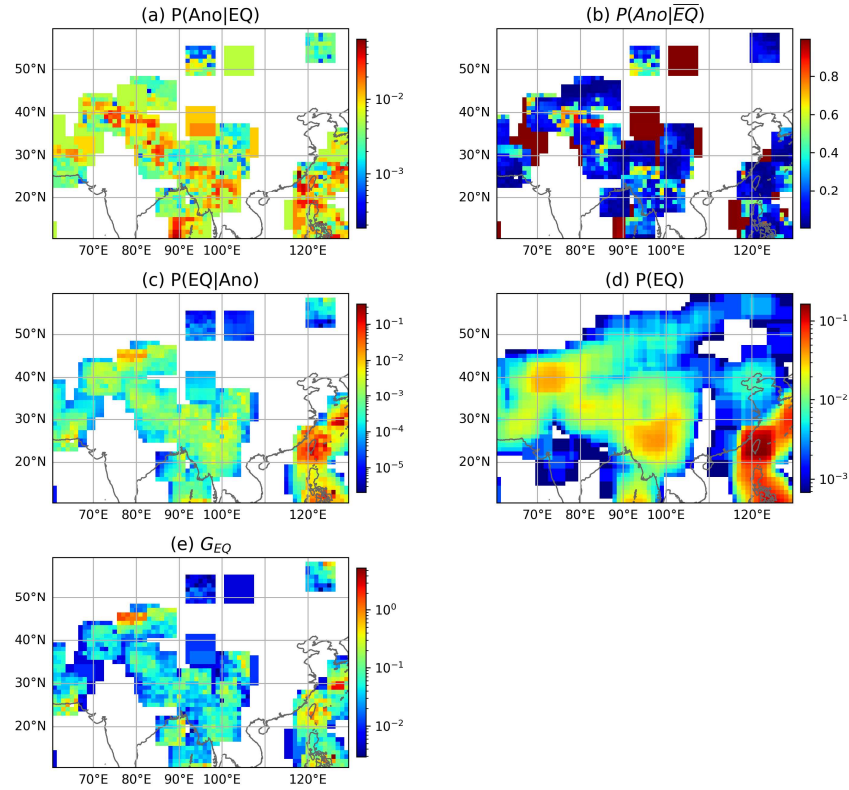

**Figure S6** Component analysis of earthquake forecast probability for the AT anomaly in Mainland China and adjacent regions on December 31, 2020. (a) Probability of AT anomaly occurrence before earthquakes; (b) Probability of AT anomaly occurrence without earthquakes; (c) Posterior probability of earthquake occurrence given the AT anomaly; (d) Prior probability of earthquake occurrence; (e) Probability gain from the AT anomaly. *Data were log10 transformed to emphasize very low values, except for panel (b).*

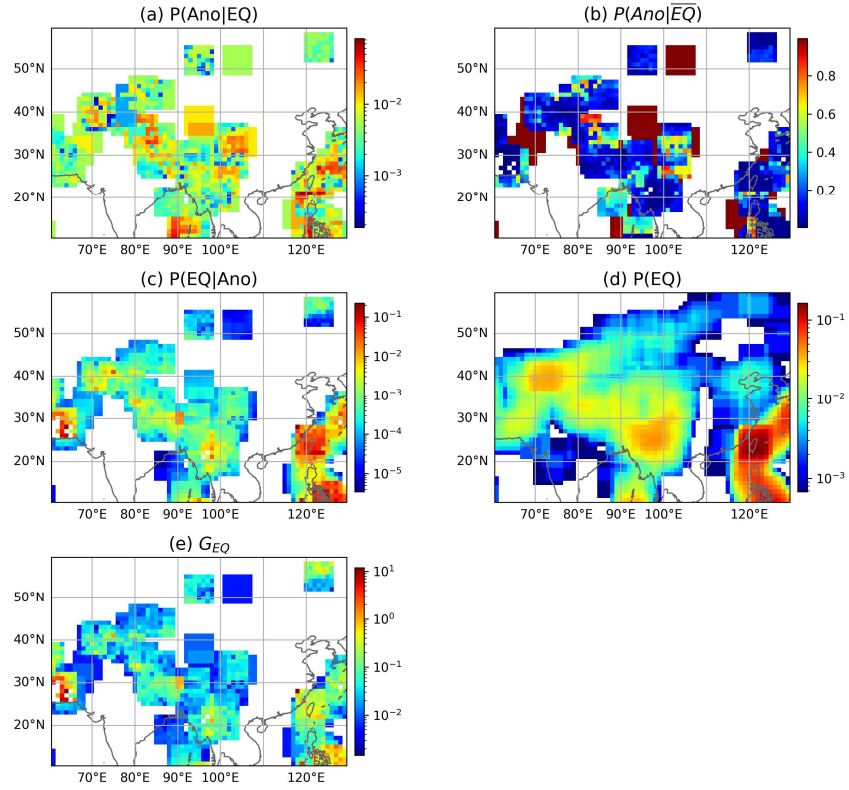

**Figure S7** Component analysis of earthquake forecast probability for the CWV anomaly in Mainland China and adjacent regions on December 31, 2020. (a) Probability of CWV anomaly occurrence before earthquakes; (b) Probability of CWV anomaly occurrence without earthquakes; (c) Posterior probability of earthquake occurrence given the CWV anomaly; (d) Prior probability of earthquake occurrence; (e) Probability gain from the CWV anomaly. Data were log10 transformed to emphasize very low values, except for panel (b).

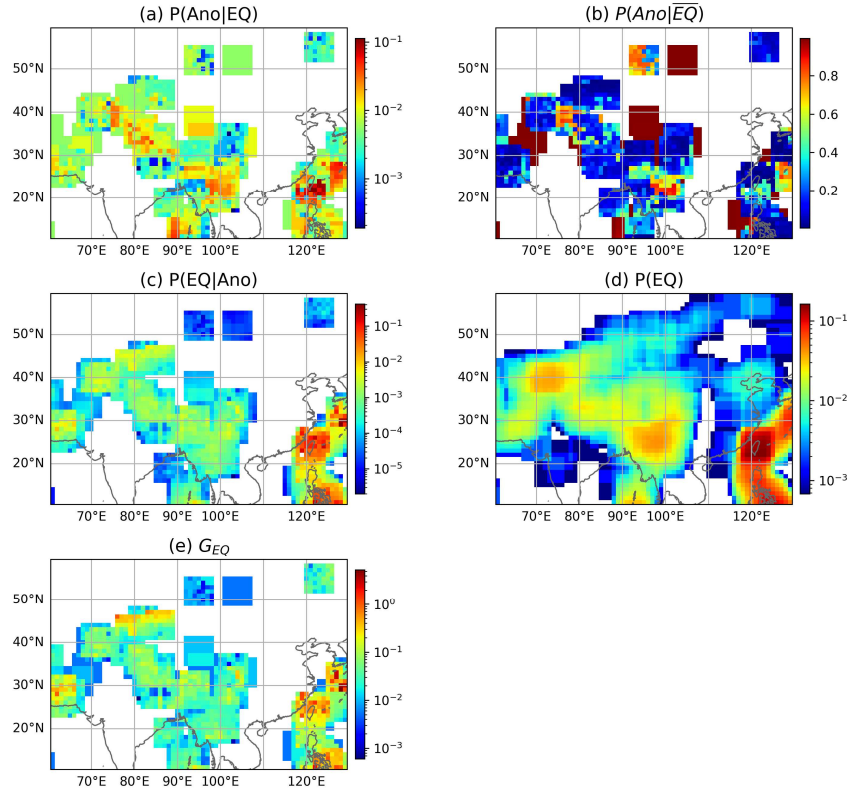

**Figure S8** Component analysis of earthquake forecast probability for the COLR anomaly in Mainland China and adjacent regions on December 31, 2020. (a) Probability of COLR anomaly occurrence before earthquakes; (b) Probability of COLR anomaly occurrence without earthquakes; (c) Posterior probability of earthquake occurrence given the COLR anomaly; (d) Prior probability of earthquake occurrence; (e) Probability gain from the COLR anomaly. **Data were log10 transformed to emphasize very low values, except for panel (b).**

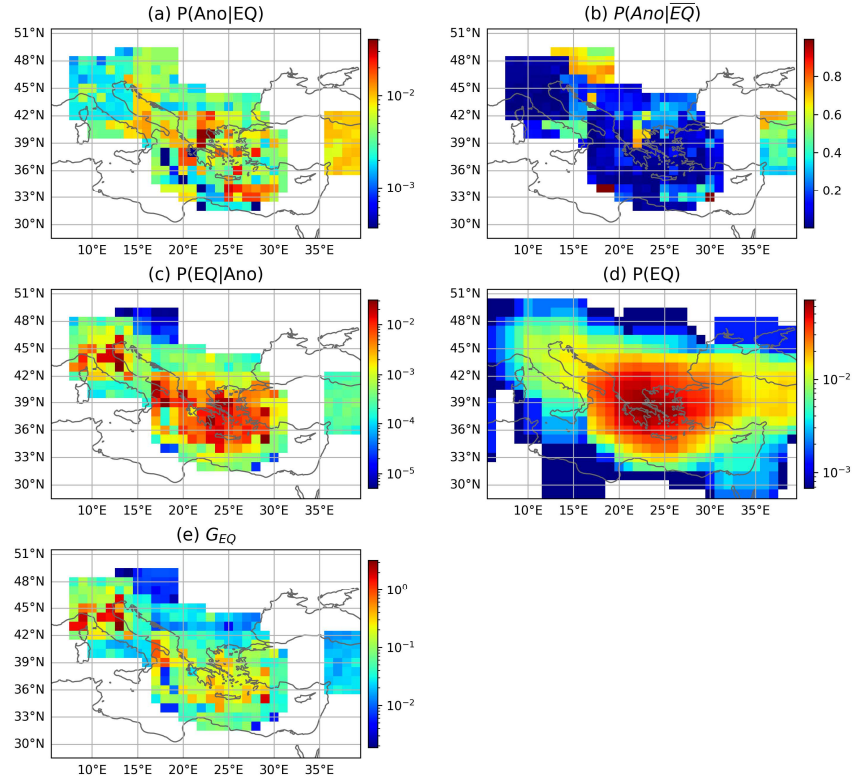

**Figure S9** Component analysis of earthquake forecast probability for the ST anomaly in Mediterranean region on December 31, 2020. (a) Probability of ST anomaly occurrence before earthquakes; (b) Probability of ST anomaly occurrence without earthquakes; (c) Posterior probability of earthquake occurrence given the ST anomaly; (d) Prior probability of earthquake occurrence; (e) Probability gain from the ST anomaly. Data were log10 transformed to emphasize very low values, except for panel (b).

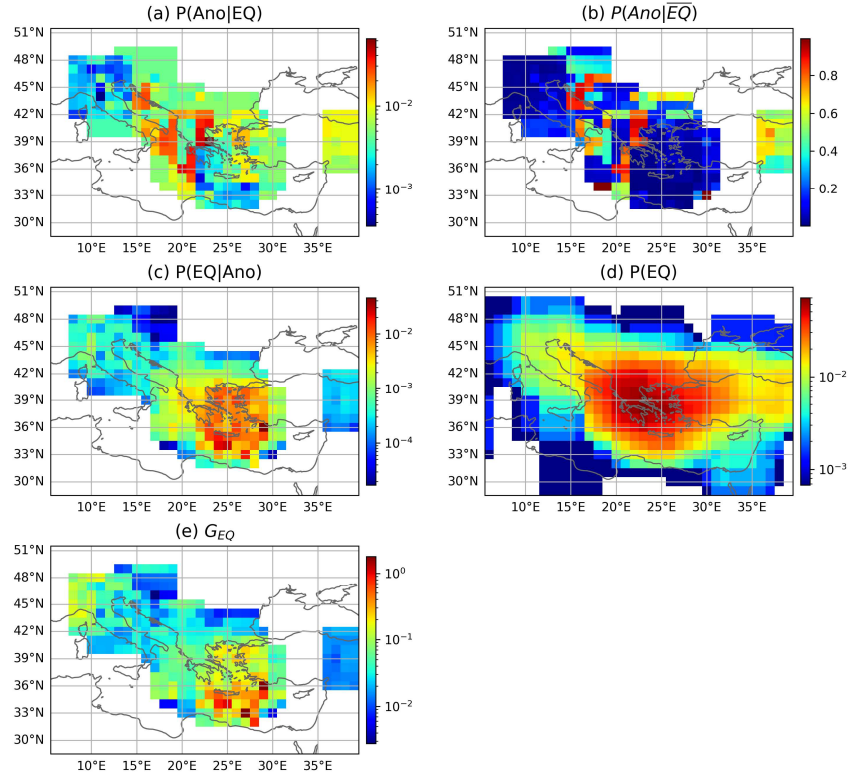

**Figure S10** Component analysis of earthquake forecast probability for the AT anomaly in Mediterranean region on December 31, 2020. (a) Probability of AT anomaly occurrence before earthquakes; (b) Probability of AT anomaly occurrence without earthquakes; (c) Posterior probability of earthquake occurrence given the AT anomaly; (d) Prior probability of earthquake occurrence; (e) Probability gain from the AT anomaly. Data were log10 transformed to emphasize very low values, except for panel (b).



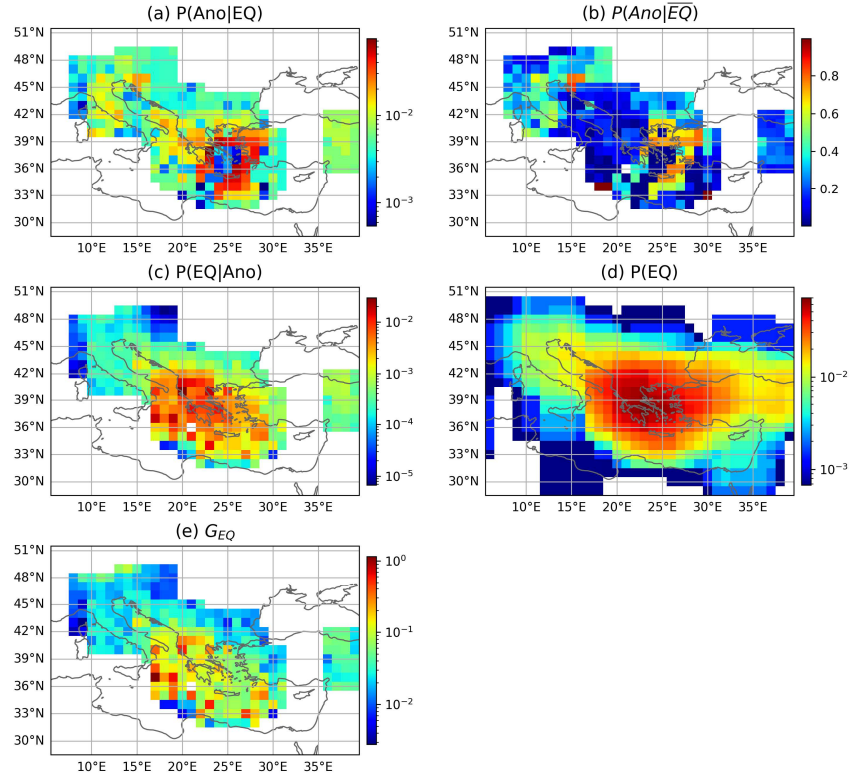

**Figure S11** Component analysis of earthquake forecast probability for the CWV anomaly in Mediterranean region on December 31, 2020. (a) Probability of CWV anomaly occurrence before earthquakes; (b) Probability of CWV anomaly occurrence without earthquakes; (c) Posterior probability of earthquake occurrence given the CWV anomaly; (d) Prior probability of earthquake occurrence; (e) Probability gain from the CWV anomaly. Data were log10 transformed to emphasize very low values, except for panel (b).

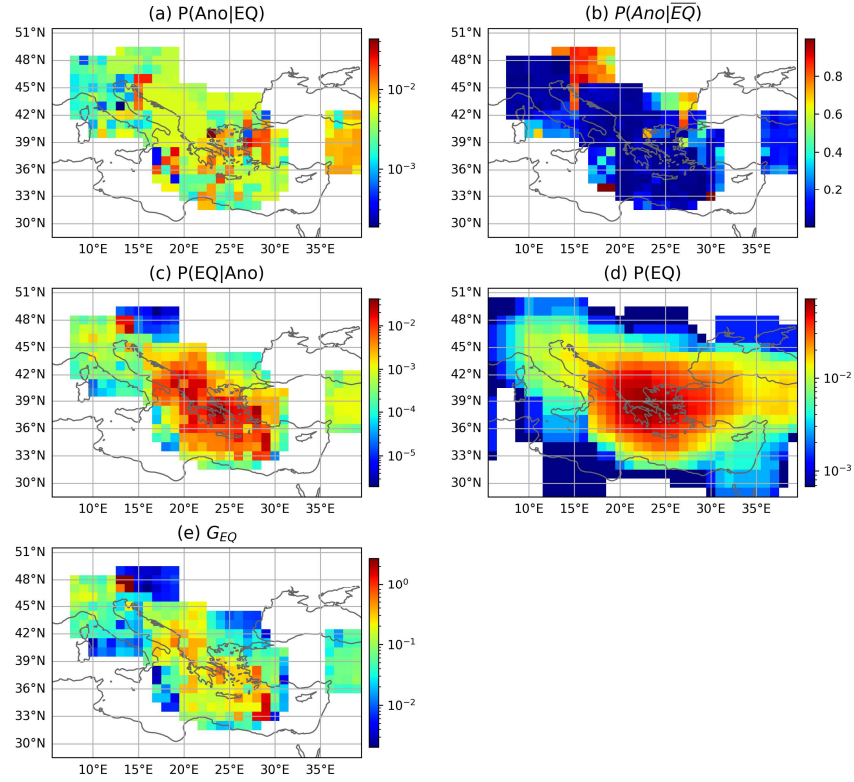

**Figure S12** Component analysis of earthquake forecast probability for the COLR anomaly in Mediterranean region on December 31, 2020. (a) Probability of COLR anomaly occurrence before earthquakes; (b) Probability of COLR anomaly occurrence without earthquakes; (c) Posterior probability of earthquake occurrence given the COLR anomaly; (d) Prior probability of earthquake occurrence; (e) Probability gain from the COLR anomaly. **Data were log10 transformed to emphasize very low values, except for panel (b).**

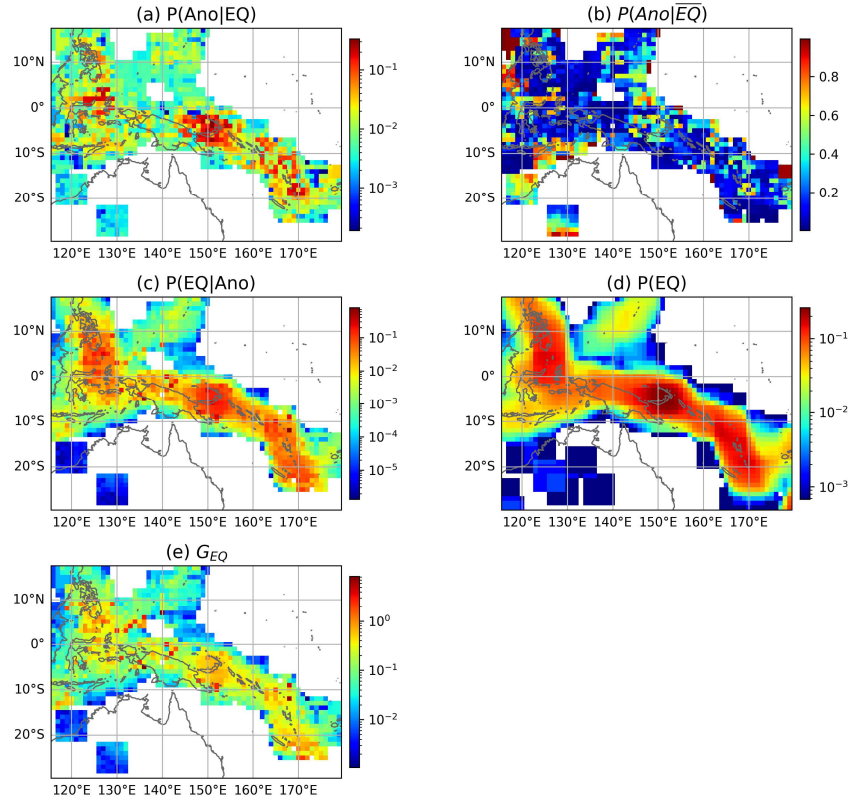

**Figure S13** Component analysis of earthquake forecast probability for the ST anomaly in Southeast Asian regions on December 31, 2020. (a) Probability of ST anomaly occurrence before earthquakes; (b) Probability of ST anomaly occurrence without earthquakes; (c) Posterior probability of earthquake occurrence given the ST anomaly; (d) Prior probability of earthquake occurrence; (e) Probability gain from the ST anomaly. Data were log10 transformed to emphasize very low values, except for panel (b).

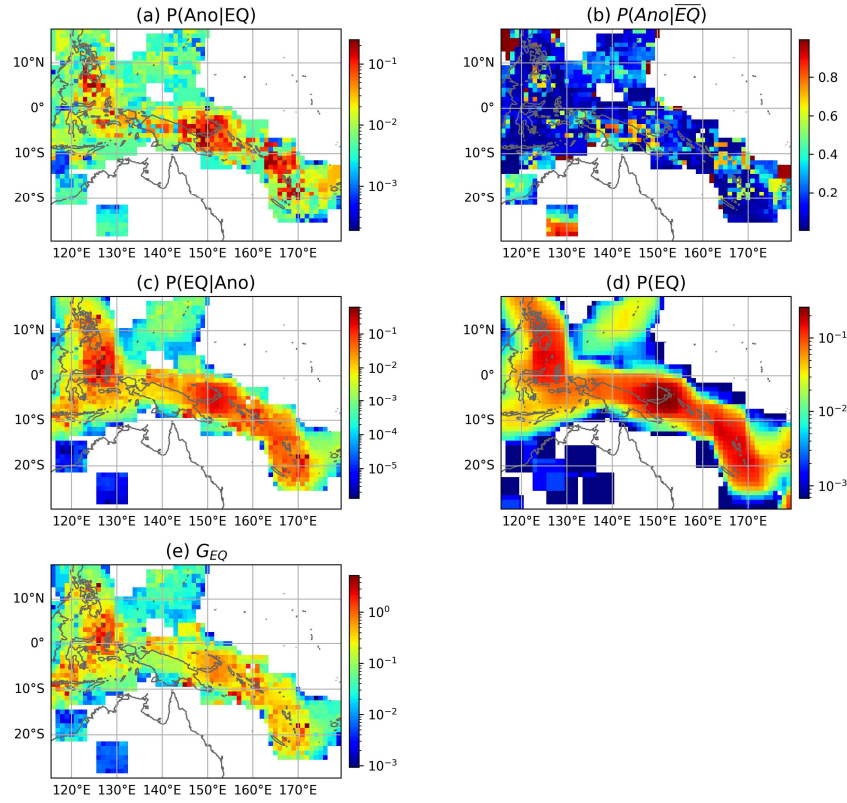

**Figure S14** Component analysis of earthquake forecast probability for the AT anomaly in Southeast Asian regions on December 31, 2020. (a) Probability of AT anomaly occurrence before earthquakes; (b) Probability of AT anomaly occurrence without earthquakes; (c) Posterior probability of earthquake occurrence given the AT anomaly; (d) Prior probability of earthquake occurrence; (e) Probability gain from the AT anomaly. **Data were log10 transformed to emphasize very low values, except for panel (b).**

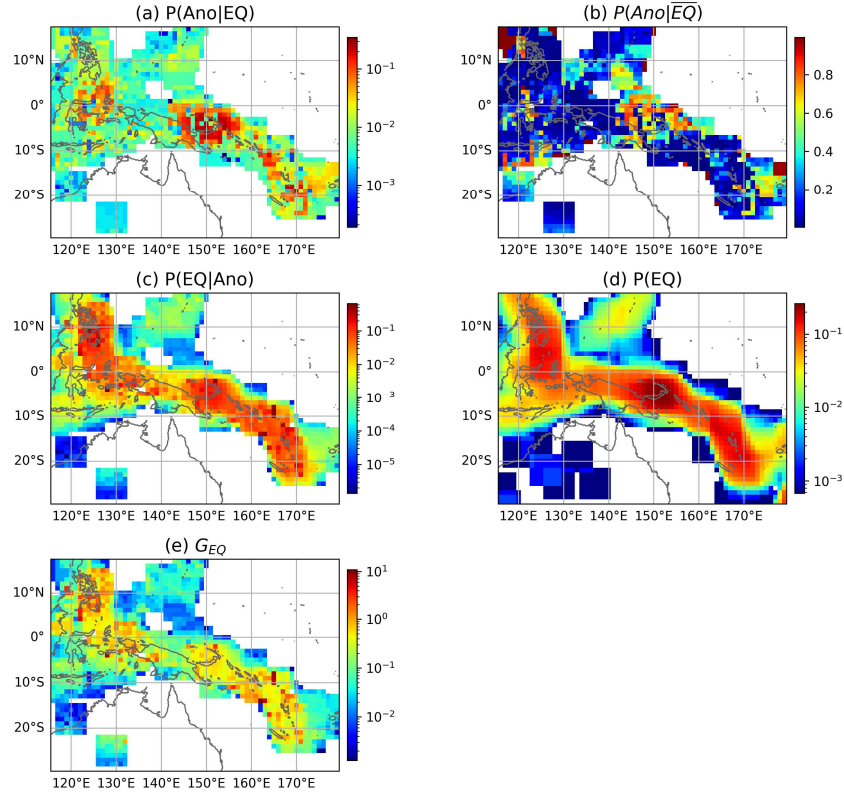

**Figure S15** Component analysis of earthquake forecast probability for the CWV anomaly in Southeast Asian regions on December 31, 2020. (a) Probability of CWV anomaly occurrence before earthquakes; (b) Probability of CWV anomaly occurrence without earthquakes; (c) Posterior probability of earthquake occurrence given the CWV anomaly; (d) Prior probability of earthquake occurrence; (e) Probability gain from the CWV anomaly. **Data were log10 transformed to emphasize very low values, except for panel (b).**

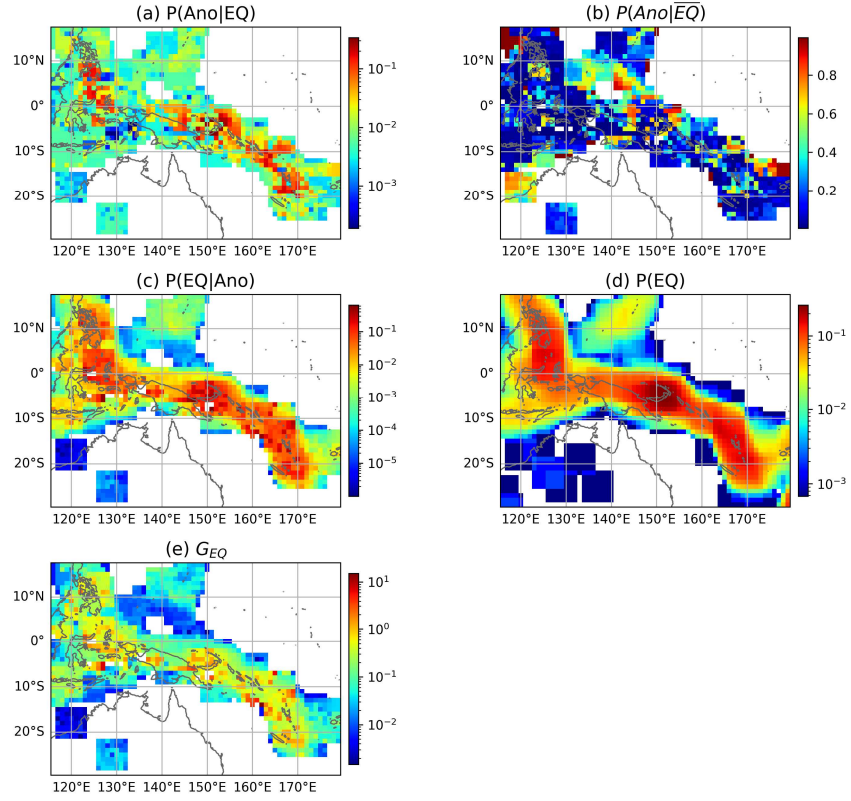

**Figure S16** Component analysis of earthquake forecast probability for the COLR anomaly in Southeast Asian regions on December 31, 2020. (a) Probability of COLR anomaly occurrence before earthquakes; (b) Probability of COLR anomaly occurrence without earthquakes; (c) Posterior probability of earthquake occurrence given the COLR anomaly; (d) Prior probability of earthquake occurrence; (e) Probability gain from the COLR anomaly. Data were log10 transformed to emphasize very low values, except for panel (b).
